# Supplementary material for: Two tartratoborates with hybrid anionic groups from unusual condensation reactions
Source: Royal Society of Chemistry journal article supplement (doi:10.1039/c7dt01360d), 2017-01-01
Supplement: c7dt01360d1.pdf [file c7dt01360d1.pdf]

## **Two Tartratoborates with Hybrid Anionic Groups from Unusual Condensation Reactions**

**Dong Yan,<sup>a,b</sup> Fei-Fei Mao,<sup>a,b</sup> Ting-Ting Ruan,<sup>a</sup> and Jiang-Gao Mao<sup>\*a</sup>**

*<sup>a</sup> State Key Laboratory of Structural Chemistry, Fujian Institute of Research on the Structure of Matter, Chinese Academy of Sciences, Fuzhou 350002, P. R. China*

*<sup>b</sup> University of the Chinese Academy of Sciences, Beijing 100039, P. R. China*

## Supporting Information

**Table S1.** Hydrogen bonds for compounds **1** and **2**.

**Table S2.** Atomic coordinates ( $\times 10^4$ ) and equivalent isotropic displacement parameters ( $\text{\AA}^2 \times 10^3$ ) for compounds **1** and **2**.

**Figure S1.** Experimental and simulated X-ray powder diffraction pattern for compound **2**.

**Figure S2.** Coordination mode of K(1) (a), and K(2) (b) in compound **1**.

**Figure S3.** Coordination mode of K(1) (a), Cu(1) (b), and Cu(2) (c) in compound **2**.

**Figure S4.** TGA and DSC curves for compound **2**.

**Figure S5.** UV-vis Optical absorption spectra (a) and diffuse reflectance spectra (b) for compound **2**.

**Figure S6.** IR spectra for compound **2**.

**Table S1.** Hydrogen bonds for compounds **1** and **2**.

| D-H...A                                                                                                                          | <i>d</i> (D-H) (Å) | <i>d</i> (H...A) (Å) | <i>d</i> (D...A) (Å) | ∠(DHA) (deg.) |
|----------------------------------------------------------------------------------------------------------------------------------|--------------------|----------------------|----------------------|---------------|
| K <sub>2</sub> [(C <sub>4</sub> H <sub>2</sub> O <sub>6</sub> )(B <sub>3</sub> O <sub>4</sub> H)](H <sub>2</sub> O) ( <b>1</b> ) |                    |                      |                      |               |
| O(7)-H(7A)...O(1W)                                                                                                               | 0.820              | 2.068                | 2.884(3)             | 173.33        |
| KCu <sub>2</sub> [(C <sub>4</sub> H <sub>2</sub> O <sub>6</sub> ) <sub>2</sub> B](H <sub>2</sub> O) <sub>2.5</sub> ( <b>2</b> )  |                    |                      |                      |               |
| O(1W)-<br>H(1WA)...O(10)                                                                                                         | 0.850              | 1.850                | 2.687(5)             | 168.10        |
| O(1W)-H(1WB)...O(7)                                                                                                              | 0.850              | 1.740                | 2.532(5)             | 153.80        |
| O(2W)-H(2WB)...O(3)                                                                                                              | 0.850              | 2.070                | 2.911(6)             | 168.20        |

**Table S2.** Atomic coordinates ( $\times 10^4$ ) and equivalent isotropic displacement parameters ( $\text{Å}^2 \times 10^3$ ) for compounds **1** and **2**.

| K <sub>2</sub> [(C <sub>4</sub> H <sub>2</sub> O <sub>6</sub> )(B <sub>3</sub> O <sub>4</sub> H)](H <sub>2</sub> O) ( <b>1</b> ) |          |         |         |       |
|----------------------------------------------------------------------------------------------------------------------------------|----------|---------|---------|-------|
|                                                                                                                                  | x        | y       | z       | U(eq) |
| K(1)                                                                                                                             | 2728(2)  | 4627(1) | 769(1)  | 54(1) |
| Cu(1)                                                                                                                            | 5040(1)  | 3392(1) | 2690(1) | 20(1) |
| Cu(2)                                                                                                                            | -195(1)  | 917(1)  | 1554(1) | 18(1) |
| B(1)                                                                                                                             | 2583(5)  | 2090(3) | 2057(4) | 17(1) |
| C(1)                                                                                                                             | 1917(5)  | 3988(3) | 3433(3) | 20(1) |
| C(2)                                                                                                                             | 1721(5)  | 2856(3) | 3506(3) | 19(1) |
| C(3)                                                                                                                             | 119(5)   | 2467(3) | 2990(3) | 22(1) |
| C(4)                                                                                                                             | -632(5)  | 1536(4) | 3434(4) | 28(1) |
| C(5)                                                                                                                             | 6388(5)  | 1999(3) | 1347(3) | 20(1) |
| C(6)                                                                                                                             | 4645(5)  | 2049(3) | 858(3)  | 18(1) |
| C(7)                                                                                                                             | 3775(5)  | 1013(3) | 939(3)  | 17(1) |
| C(8)                                                                                                                             | 2518(5)  | 872(3)  | 123(3)  | 19(1) |
| O(1)                                                                                                                             | 3290(4)  | 4329(2) | 3117(3) | 28(1) |
| O(2)                                                                                                                             | 666(4)   | 4489(2) | 3713(3) | 28(1) |
| O(3)                                                                                                                             | -1097(6) | 1568(3) | 4270(3) | 54(1) |
| O(4)                                                                                                                             | -803(4)  | 775(2)  | 2892(3) | 27(1) |
| O(5)                                                                                                                             | 6597(4)  | 2429(2) | 2139(2) | 27(1) |
| O(6)                                                                                                                             | 7495(3)  | 1506(2) | 918(2)  | 23(1) |
| O(7)                                                                                                                             | 3166(4)  | 729(3)  | -674(3) | 34(1) |
| O(8)                                                                                                                             | 918(3)   | 944(2)  | 290(2)  | 22(1) |
| O(9)                                                                                                                             | 3477(3)  | 2685(2) | 1356(2) | 20(1) |
| O(10)                                                                                                                            | 2979(3)  | 1045(2) | 1847(2) | 18(1) |
| O(11)                                                                                                                            | 3114(3)  | 2370(2) | 3045(2) | 19(1) |

|                                                                                                                  |          |         |          |       |
|------------------------------------------------------------------------------------------------------------------|----------|---------|----------|-------|
| O(12)                                                                                                            | 727(3)   | 2275(2) | 2040(2)  | 20(1) |
| O(1W)                                                                                                            | 6063(6)  | 4524(3) | 2024(3)  | 51(1) |
| O(2W)                                                                                                            | 6229(5)  | 3308(3) | 4115(3)  | 47(1) |
| O(3W)                                                                                                            | 4938(5)  | 6192(3) | 596(3)   | 76(3) |
| <b>KCu<sub>2</sub>[(C<sub>4</sub>H<sub>2</sub>O<sub>6</sub>)<sub>2</sub>B](H<sub>2</sub>O)<sub>2.5</sub> (2)</b> |          |         |          |       |
|                                                                                                                  | x        | y       | z        | U(eq) |
| K(1)                                                                                                             | 4530(1)  | 6382(1) | 10736(1) | 28(1) |
| K(2)                                                                                                             | 86(1)    | 6142(1) | -2688(1) | 28(1) |
| C(1)                                                                                                             | 1261(2)  | 6156(2) | 1612(3)  | 22(1) |
| C(2)                                                                                                             | 1801(2)  | 6558(2) | 3477(3)  | 20(1) |
| C(3)                                                                                                             | 2753(2)  | 5782(2) | 4584(3)  | 21(1) |
| C(4)                                                                                                             | 3203(2)  | 6103(2) | 6509(3)  | 20(1) |
| B(1)                                                                                                             | -450(2)  | 6376(2) | 2789(3)  | 22(1) |
| B(2)                                                                                                             | -2226(2) | 5489(2) | 3619(3)  | 21(1) |
| B(3)                                                                                                             | -2557(3) | 7144(2) | 2203(3)  | 23(1) |
| O(1)                                                                                                             | 1891(2)  | 5965(1) | 618(2)   | 30(1) |
| O(2)                                                                                                             | 33(2)    | 6028(1) | 1226(2)  | 25(1) |
| O(3)                                                                                                             | 747(2)   | 6746(1) | 4086(2)  | 24(1) |
| O(4)                                                                                                             | 2227(2)  | 4816(1) | 4573(2)  | 23(1) |
| O(5)                                                                                                             | 2939(2)  | 5411(1) | 7511(2)  | 25(1) |
| O(6)                                                                                                             | 3728(2)  | 6900(1) | 7060(2)  | 27(1) |
| O(7)                                                                                                             | -3439(2) | 7874(1) | 1410(3)  | 32(1) |
| O(8)                                                                                                             | -2995(2) | 6392(1) | 3055(2)  | 23(1) |
| O(9)                                                                                                             | -988(2)  | 5567(1) | 3467(2)  | 25(1) |
| O(10)                                                                                                            | -1351(2) | 7196(1) | 2111(2)  | 26(1) |
| O(1W)                                                                                                            | 3835(2)  | 4377(2) | 11175(3) | 47(1) |

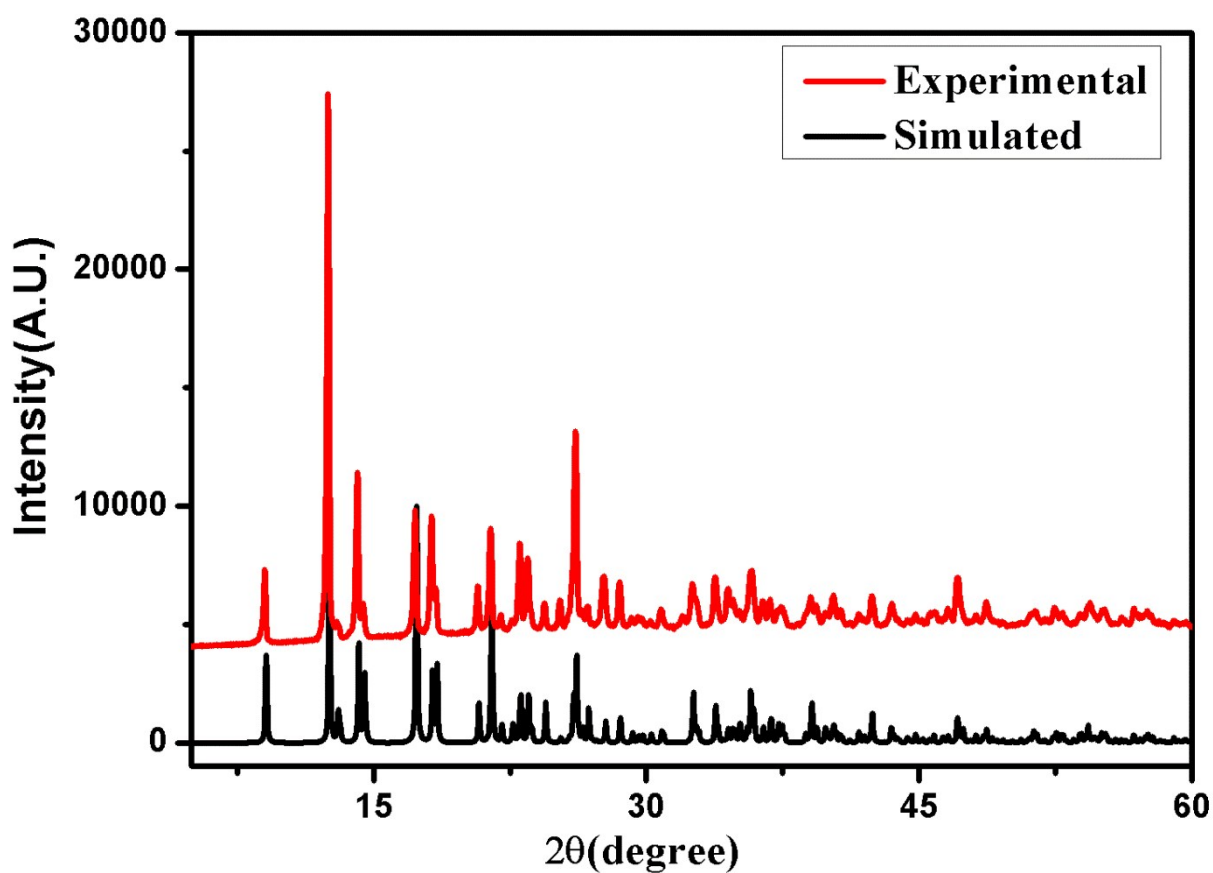

**Figure S1.** Experimental and simulated X-ray powder diffraction patterns for compound 2.

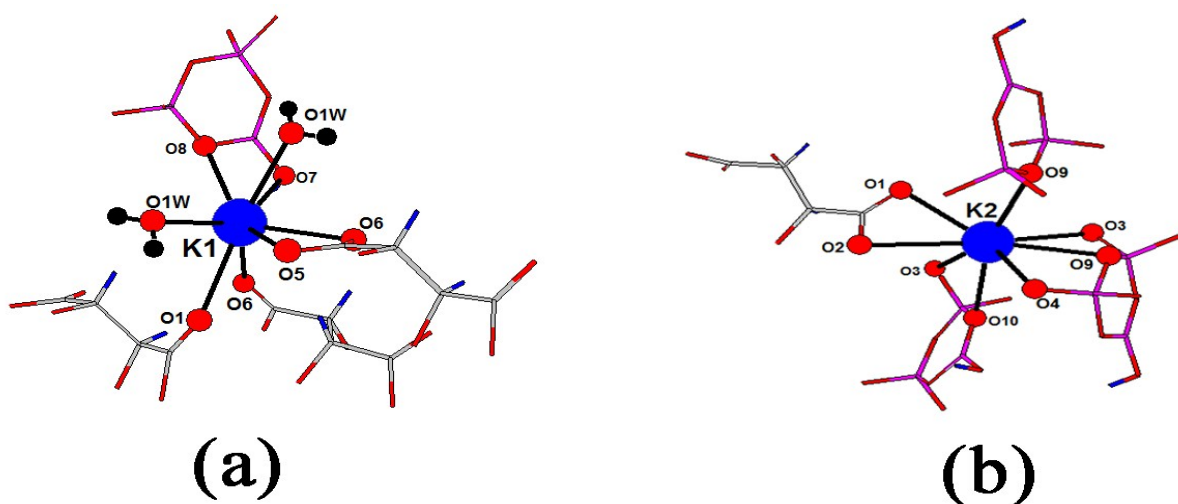

**Figure S2.** Coordination mode of K(1) (a), and K(2) (b) in compound 1.

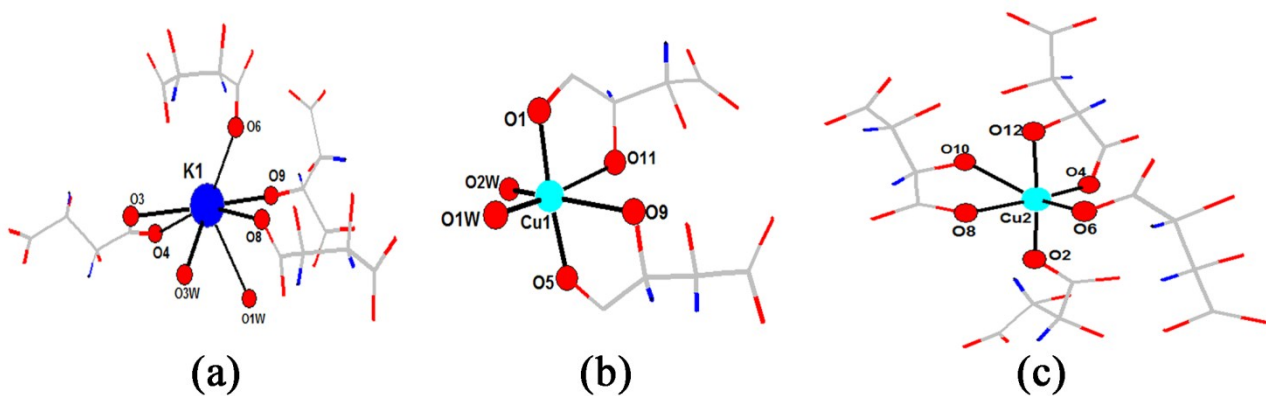

Figure S3. Coordination mode of K(1) (a), Cu(1) (b), and Cu(2) (c) in compound 2.

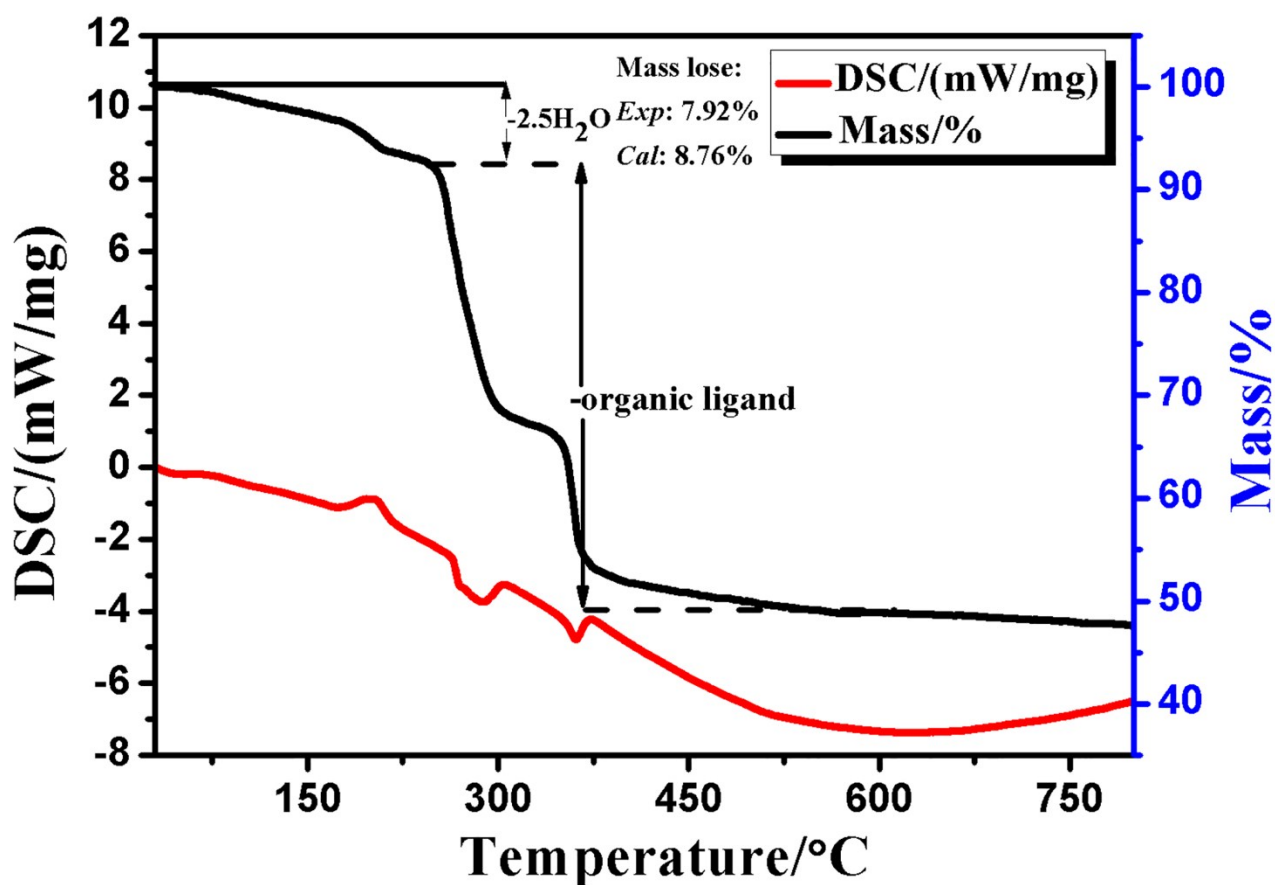

Figure S4. TGA and DSC curves for compound 2.

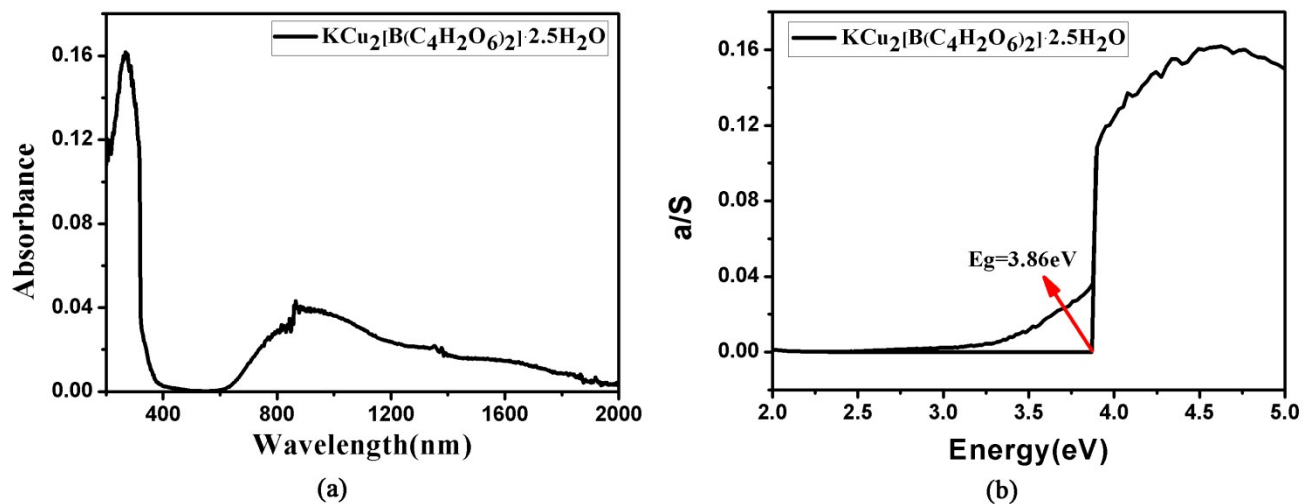

**Figure S5.** UV-vis Optical absorption spectra (a) and diffuse reflectance spectra (b) for compound 2.

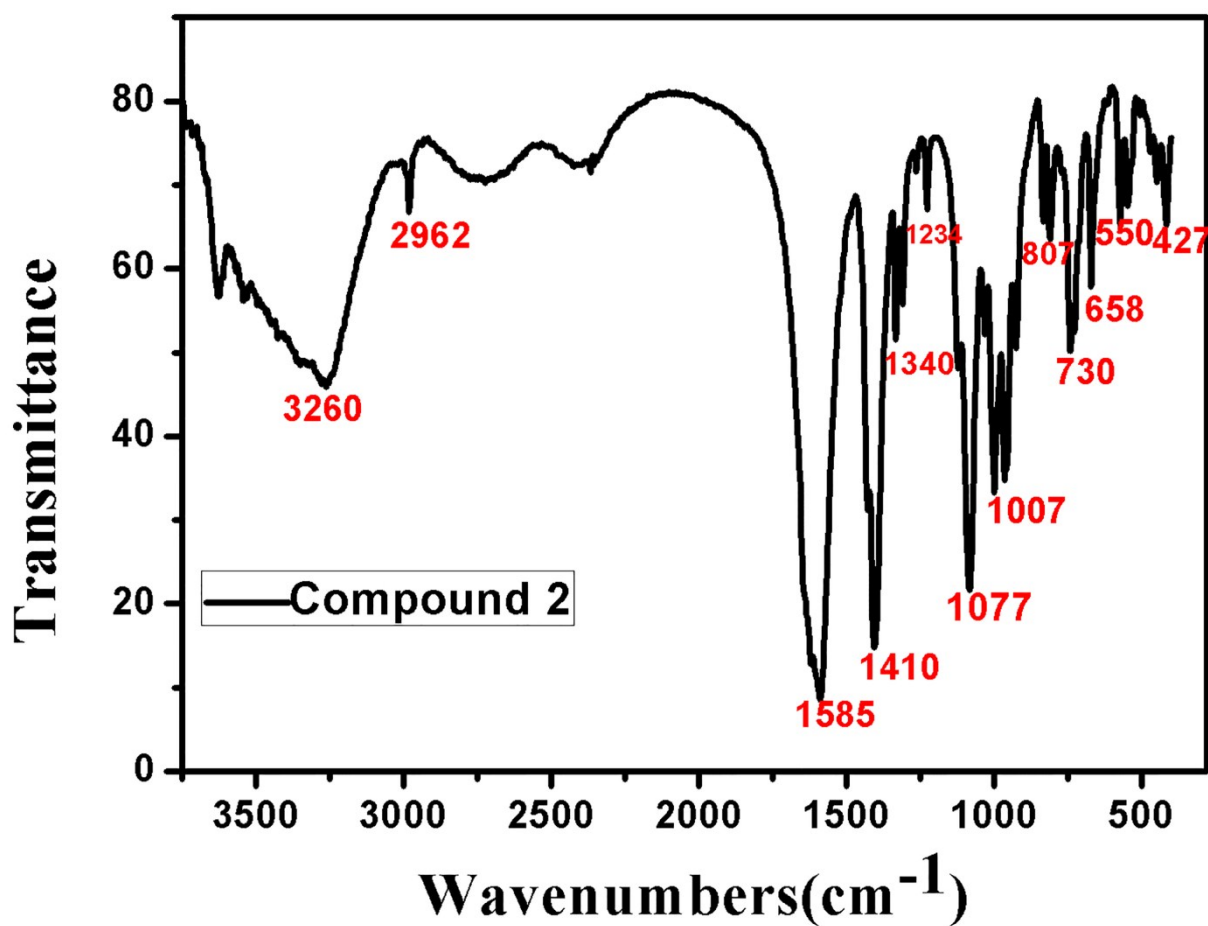

**Figure S6.** IR spectra for compound 2.
